# Supplementary material for: The Mediating Effects of Nutritional Status on the Relationship between Number of Residual Teeth and Cognitive Function among Older Adults: A Cross-Sectional Multicenter Study
Source: MDPI journal article supplement (doi:10.3390/nu15143089), 2023-07-10
Supplement: s1 [file s1]

## Supplementary Materials

**Table S1.** The results of multiple comparisons and Bonferroni correction.

| Characters                          | Multiple comparisons                 |                                                    |                                                                       |
|-------------------------------------|--------------------------------------|----------------------------------------------------|-----------------------------------------------------------------------|
|                                     | Mild Cognitive Impairment vs. Normal | Moderate to Severe Cognitive Impairment vs. Normal | Moderate to Severe Cognitive Impairment vs. Mild Cognitive Impairment |
| Age, mean (SD)                      | <0.001                               | <0.001                                             | <0.001                                                                |
| Age group, n (%)                    | <0.001                               | <0.001                                             | 0.007                                                                 |
| Sex, n (%)                          | <0.001                               | <0.001                                             | 0.034                                                                 |
| Ethnic group, n (%)                 | <0.001                               | <0.001                                             | <0.001                                                                |
| Educational level, n (%)            | <0.001                               | <0.001                                             | <0.001                                                                |
| Occupation, n (%)                   | <0.001                               | <0.001                                             | 0.02                                                                  |
| Spouse status, n (%)                | <0.001                               | <0.001                                             | <0.001                                                                |
| Longevity families, n (%)           | <0.001                               | <0.001                                             | 0.32                                                                  |
| Number of residual teeth, mean (SD) | <0.001                               | <0.001                                             | 0.006                                                                 |
| Number of residual teeth, n (%)     | <0.001                               | <0.001                                             | 0.016                                                                 |
| Denture usage, n (%)                | 0.032                                | 1                                                  | 1                                                                     |
| MNA-SF score, mean (SD)             | <0.001                               | <0.001                                             | <0.001                                                                |
| MNA-SF assessment status, n (%)     | <0.001                               | <0.001                                             | <0.001                                                                |
| Type of drinking water, n (%)       | 0.921                                | 0.002                                              | 0.403                                                                 |
| History of smoking, n (%)           | <0.001                               | <0.001                                             | 1                                                                     |
| History of alcohol use, n (%)       | <0.001                               | <0.001                                             | 0.704                                                                 |
| History of drinking tea, n (%)      | <0.001                               | <0.001                                             | 0.199                                                                 |

**Table S2.** MNA-SF score as mediator of the effect of residual teeth on cognitive function.

|              |                     | Model 1 |                  | Model 2 |                  |
|--------------|---------------------|---------|------------------|---------|------------------|
|              |                     | $\beta$ | 95% CI           | $\beta$ | 95% CI           |
| MNA-SF score | ACME                | -0.099  | -0.114 to -0.084 | -0.061  | -0.076 to -0.046 |
|              | ADE                 | -0.130  | -0.164 to -0.097 | -0.089  | -0.126 to -0.050 |
|              | Total Effect        | -0.229  | -0.264 to -0.194 | -0.150  | -0.186 to -0.110 |
|              | Proportion Mediated | 0.431   | 0.361 to 0.505   | 0.407   | 0.300 to 0.554   |

Mediation analysis statistic details were adjusted none covariate in Model 1, and were adjusted by denture usage, sex, age, ethnic groups, occupation, educational level, spouse status, longevity families, and life styles (type of drinking water, smoking, alcohol use and drinking tea) in Model 2. Abbreviations. ACME: average causal mediation effects (indirect effect); ADE: average direct effects; CI: confidence Interval.

**Table S3.** The mediating analysis in older adults stratified by age.

| Group       | Parameter           | $\beta$ | 95% Confidence Interval |
|-------------|---------------------|---------|-------------------------|
| 50-59 years | ACME                | -0.0439 | -0.0672 to -0.019       |
|             | ADE                 | -0.1285 | -0.1888 to -0.0675      |
|             | Total Effect        | -0.1724 | -0.2363 to -0.1067      |
|             | Proportion Mediated | 0.2548  | 0.1137 to 0.4335        |
| 60-69 years | ACME                | -0.0834 | -0.1053 to -0.0621      |
|             | ADE                 | -0.102  | -0.1538 to -0.0486      |
|             | Total Effect        | -0.1854 | -0.2394 to -0.1301      |
|             | Proportion Mediated | 0.4487  | 0.3256 to 0.6493        |
| 70-79 years | ACME                | -0.1184 | -0.1598 to -0.0797      |
|             | ADE                 | -0.0865 | -0.1639 to -0.0084      |
|             | Total Effect        | -0.2049 | -0.2893 to -0.1189      |
|             | Proportion Mediated | 0.5777  | 0.3889 to 0.935         |
| 80+ years   | ACME                | -0.2239 | -0.3493 to -0.1117      |
|             | ADE                 | -0.2517 | -0.4672 to -0.0439      |
|             | Total Effect        | -0.4756 | -0.7147 to -0.2499      |
|             | Proportion Mediated | 0.4699  | 0.2589 to 0.8436        |

**Table S4.** The summary of structural equation model.

| Pathway                                          | Estimate | SE    | z       | P      | LLCI   | ULCI   | $\beta$ |
|--------------------------------------------------|----------|-------|---------|--------|--------|--------|---------|
| Nutritional Status <- Number of residual teeth   | 0.193    | 0.019 | 9.909   | <0.001 | 0.154  | 0.231  | 0.134   |
| Nutritional Status <- Sex                        | -0.196   | 0.039 | -4.965  | <0.001 | -0.273 | -0.118 | -0.06   |
| Nutritional Status <- Age                        | -0.018   | 0.003 | -6.865  | <0.001 | -0.023 | -0.013 | -0.092  |
| Nutritional Status <- Tibetan                    | -0.153   | 0.054 | -2.85   | 0.004  | -0.258 | -0.048 | -0.038  |
| Nutritional Status <- Qiang                      | -0.103   | 0.053 | -1.949  | 0.051  | -0.207 | 0.001  | -0.026  |
| Nutritional Status <- Yi                         | -0.795   | 0.07  | -11.356 | <0.001 | -0.932 | -0.657 | -0.145  |
| Nutritional Status <- Uyghur                     | -0.238   | 0.074 | -3.219  | 0.001  | -0.383 | -0.093 | -0.042  |
| Nutritional Status <- Others                     | -0.623   | 0.074 | -8.422  | <0.001 | -0.768 | -0.478 | -0.106  |
| Number of residual teeth <- Sex                  | -0.209   | 0.025 | -8.453  | <0.001 | -0.258 | -0.161 | -0.092  |
| Number of residual teeth <- Age                  | -0.058   | 0.001 | -40.094 | <0.001 | -0.061 | -0.056 | -0.438  |
| Number of residual teeth <- Tibetan              | -0.279   | 0.034 | -8.271  | <0.001 | -0.345 | -0.213 | -0.1    |
| Number of residual teeth <- Qiang                | 0.002    | 0.033 | 0.061   | 0.952  | -0.064 | 0.068  | 0.001   |
| Number of residual teeth <- Yi                   | -0.421   | 0.044 | -9.587  | <0.001 | -0.507 | -0.335 | -0.11   |
| Number of residual teeth <- Uyghur               | -0.918   | 0.045 | -20.267 | <0.001 | -1.007 | -0.83  | -0.233  |
| Number of residual teeth <- Others               | -0.238   | 0.047 | -5.107  | <0.001 | -0.33  | -0.147 | -0.058  |
| Cognitive impairment <- Number of residual teeth | -0.13    | 0.015 | -8.447  | <0.001 | -0.16  | -0.1   | -0.096  |
| Cognitive impairment <- Nutritional Status       | -0.363   | 0.011 | -33.907 | <0.001 | -0.384 | -0.342 | -0.386  |

$\beta$  is standardized coefficient.
